# Supplementary material
Source: Springer Nature journal article supplement (https://mijn.bsl.nl/resource/supplementary/13047_2013_499_MOESM1_ESM.pdf/7473976)

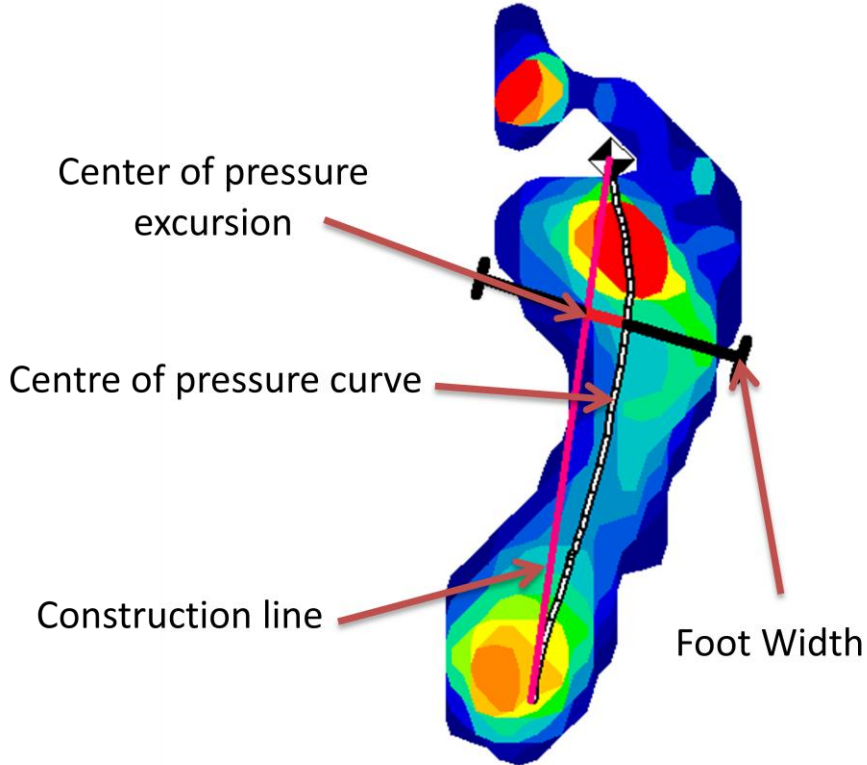

$$CPEI = \frac{\text{Center of pressure excursion}}{\text{Foot Width}} \times 100 \%$$

Supplement: MOESM1 [file 7473976]
